## CORRECTION

# Correction: Assertive, trainable and older dogs are perceived as more dominant in multi-dog households

Lisa J. Wallis, Ivaylo B. Iotchev, Enikő Kubinyi

The Data Availability statement for this paper is incorrect. The correct statement is: Data underlying the study are available on the Open Science Framework repository. Citation: Wallis, L. J., Dr., & Kubinyi, E. (2020, February 19). ERC Starting Grant (680040) Cognitive Ageing In Dogs, Senior Family Dog Project. <https://doi.org/10.17605/OSF.IO/R4H2Q>.

## Reference

1. Wallis LJ, Iotchev IB, Kubinyi E (2020) Assertive, trainable and older dogs are perceived as more dominant in multi-dog households. PLoS ONE 15(1): e0227253. <https://doi.org/10.1371/journal.pone.0227253> PMID: 31899765

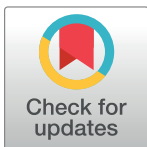

## OPEN ACCESS

**Citation:** Wallis LJ, Iotchev IB, Kubinyi E (2020) Correction: Assertive, trainable and older dogs are perceived as more dominant in multi-dog households. PLoS ONE 15(3): e0231043. <https://doi.org/10.1371/journal.pone.0231043>

**Published:** March 24, 2020

**Copyright:** © 2020 Wallis et al. This is an open access article distributed under the terms of the [Creative Commons Attribution License](https://creativecommons.org/licenses/by/4.0/), which permits unrestricted use, distribution, and reproduction in any medium, provided the original author and source are credited.
